# Supplementary material
Source: publisher site journal article supplement (https://kjim.org/upload/media/kjim-2023-476-Supplementary-Table-2.pdf)
Supplement: Supplementary file 1 [file kjim-2023-476-Supplementary-Table-2.pdf]

**Supplementary Table 2. Discriminative properties of the Gout Impact Scale according to clinical features**

| Clinical features                      | Gout Impact Scale    |                              |                            |                          |                            |
|----------------------------------------|----------------------|------------------------------|----------------------------|--------------------------|----------------------------|
|                                        | Gout concern overall | Gout medication side effects | Unmet gout treatment needs | Well-being during attack | Gout concern during attack |
| <b>Tophi</b>                           |                      |                              |                            |                          |                            |
| Yes (n = 51)                           | 79.29 ± 18.43        | 61.20 ± 21.30                | 49.00 ± 11.24              | 54.96 ± 27.19            | 60.13 ± 22.30              |
| No (n = 160)                           | 80.65 ± 18.49        | 66.27 ± 21.69                | 46.59 ± 14.23              | 56.37 ± 27.05            | 62.82 ± 22.07              |
| <i>p</i> value                         | 0.65                 | 0.16                         | 0.28                       | 0.75                     | 0.45                       |
| <b>Erosion</b>                         |                      |                              |                            |                          |                            |
| Yes (n = 51)                           | 77.08 ± 20.53        | 61.22 ± 23.28                | 48.13 ± 12.76              | 47.40 ± 28.82            | 59.75 ± 19.53              |
| No (n = 101)                           | 78.66 ± 18.58        | 62.37 ± 21.69                | 47.19 ± 13.91              | 53.75 ± 26.90            | 56.31 ± 22.53              |
| <i>p</i> value                         | 0.64                 | 0.77                         | 0.69                       | 0.19                     | 0.36                       |
| <b>No. of attacks in the past year</b> |                      |                              |                            |                          |                            |
| 0–2 (n = 95)                           | 75.73 ± 20.26        | 57.85 ± 22.22                | 48.42 ± 12.94              | 50.62 ± 27.10            | 58.31 ± 21.89              |
| ≥ 3 (n = 124)                          | 83.97 ± 16.35        | 69.70 ± 19.57                | 46.14 ± 13.78              | 59.93 ± 25.48            | 65.57 ± 21.76              |
| <i>p</i> value                         | < 0.001***           | < 0.001***                   | 0.22                       | 0.01*                    | 0.02*                      |
| <b>Serum urate level</b>               |                      |                              |                            |                          |                            |
| < 6 mg/dL (n = 15)                     | 82.50 ± 15.88        | 52.50 ± 17.17                | 40.56 ± 16.02              | 54.71 ± 23.29            | 63.33 ± 18.88              |
| ≥ 6 mg/dL (n = 206)                    | 80.60 ± 18.83        | 66.13 ± 20.99                | 47.74 ± 12.90              | 55.85 ± 26.79            | 62.19 ± 22.41              |
| <i>p</i> value                         | 0.70                 | 0.02*                        | 0.04*                      | 0.88                     | 0.85                       |

Values are presented as mean ± standard deviation.

Two-tailed Student's *t*-tests.

\**p* < 0.05; \*\*\**p* < 0.001.
